# Supplementary material for: Chronic AMPK inactivation slows SHH medulloblastoma progression by inhibiting mTORC1 signaling and depleting tumor stem cells
Source: PubMed Central journal article supplement — iScience. 2023 Nov 14;26(12):108443. doi: 10.1016/j.isci.2023.108443 (PMC10716552; doi:10.1016/j.isci.2023.108443), 2023-11-14
Supplement: mmc1.pdf [file mmc1.pdf]

**iScience, Volume 26**

**Supplemental information**

**Chronic AMPK inactivation slows SHH  
medulloblastoma progression by inhibiting mTORC1  
signaling and depleting tumor stem cells**

**Daniel Shiloh Malawsky, Taylor Dismuke, Hedi Liu, Ethan Castellino, Jay Brenman, Biplab Dasgupta, Andrey Tikunov, and Timothy R. Gershon**

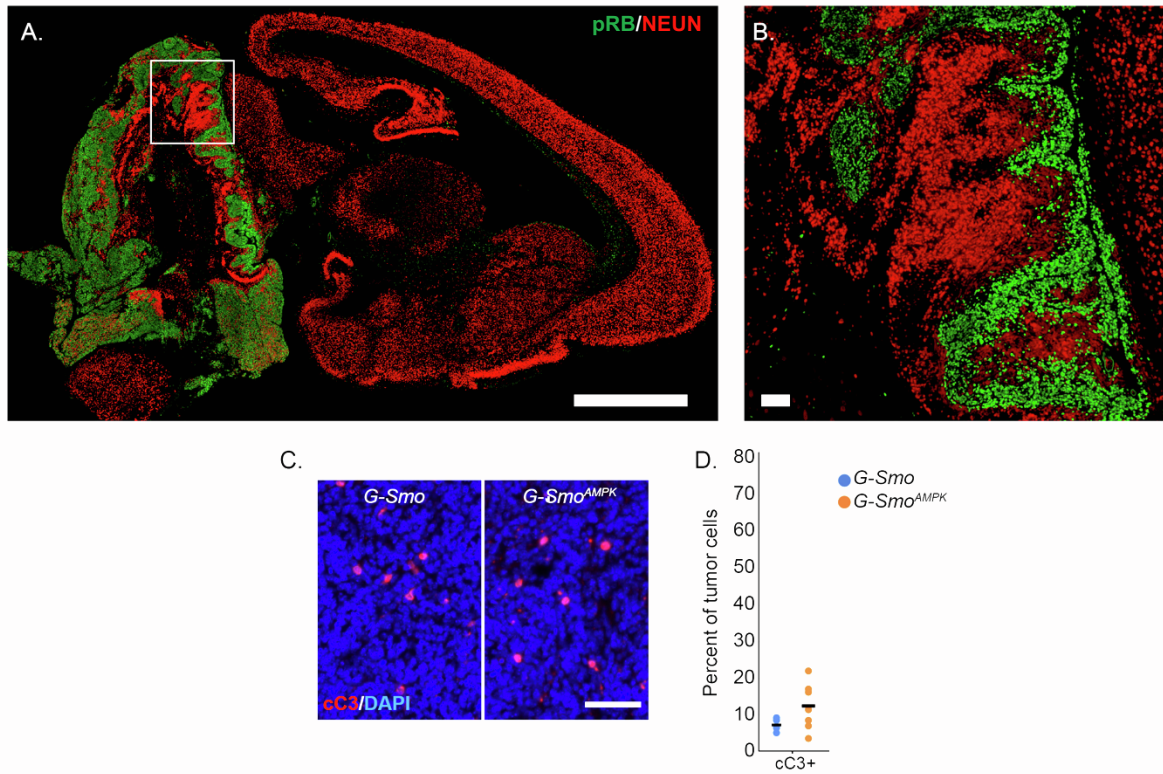

**Supplementary Figure 1, related to Figure 1. IF studies of *G-Smo* and *G-Smo*<sup>AMPK</sup> tumors. (A) Representative image of a *G-Smo* tumor double-labeled for pRB (green) and NEUN (red). (B) higher magnification view of the same section as in (A), showing the region within the white square in (A). (C) Images of representative *G-Smo* and *G-Smo*<sup>AMPK</sup> tumors stained for cC3 (red) and DAPI (blue). (D) quantification of cC3+ cells in tumors of each genotype. Bars = 2 mm in (A), 100  $\mu$ m in (B) and 50  $\mu$ m in (C).**

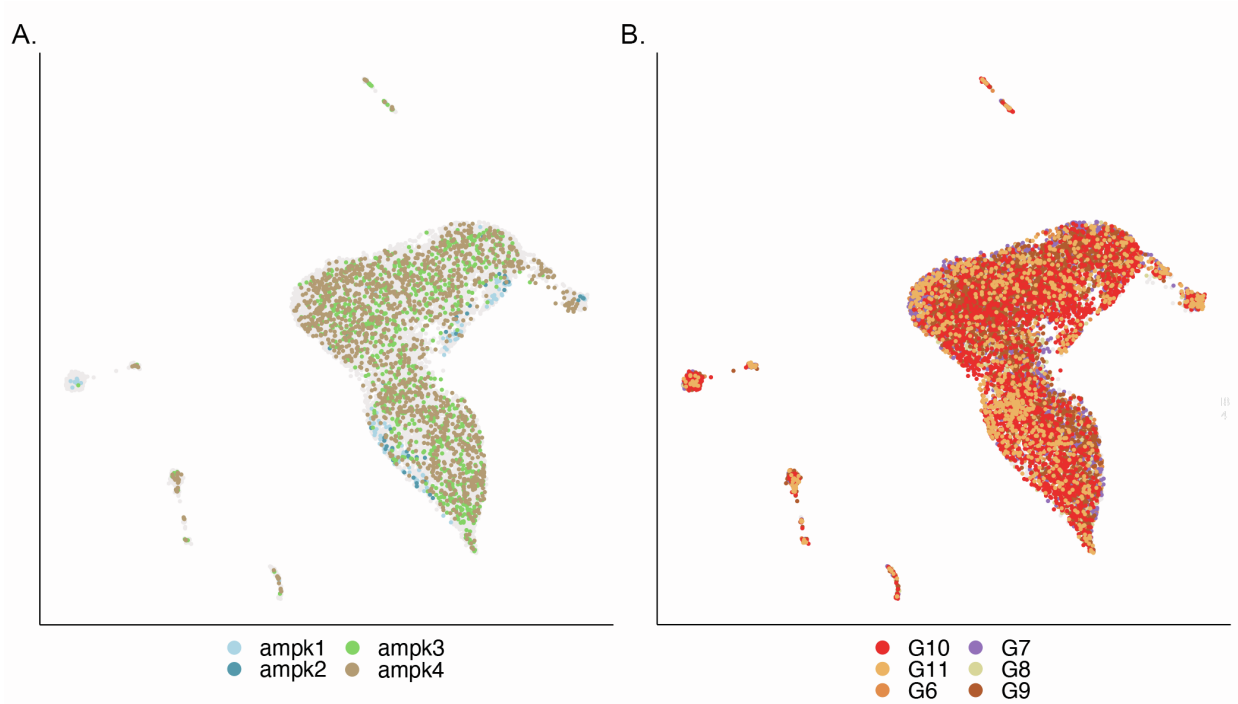

**Supplementary Figure 2, related to Figure 2. scRNA-seq studies of *G-Smo<sup>AMPK</sup>* and *G-Smo* control tumors. (A) UMAP showing the distribution of the 4 replicate *G-Smo<sup>AMPK</sup>* tumors (B) UMAP showing the distribution of the 6 replicate *G-Smo* tumors.**
